# Supplementary material for: Tailored activated carbon from glycerol: role of acid dehydrator on physiochemical characteristics and adsorption performance
Source: Royal Society of Chemistry journal article supplement (doi:10.1039/c7ta02898a), 2017-01-01
Supplement: c7ta02898a1.pdf [file c7ta02898a1.pdf]

**Tailored Activated Carbon from Glycerol: Role of Acid Dehydrator on Physiochemical  
Characteristics and Adsorption Performance**

Yanbin Cui<sup>1</sup>, John D. Atkinson<sup>1\*</sup>

<sup>1</sup> Department of Civil, Structural, and Environmental Engineering, State University of New York  
at Buffalo, Buffalo, NY 14260, USA

\* Corresponding author. Tel: 1 716 645-4001. Email: [AtkJDW@buffalo.edu](mailto:AtkJDW@buffalo.edu) (John D. Atkinson)

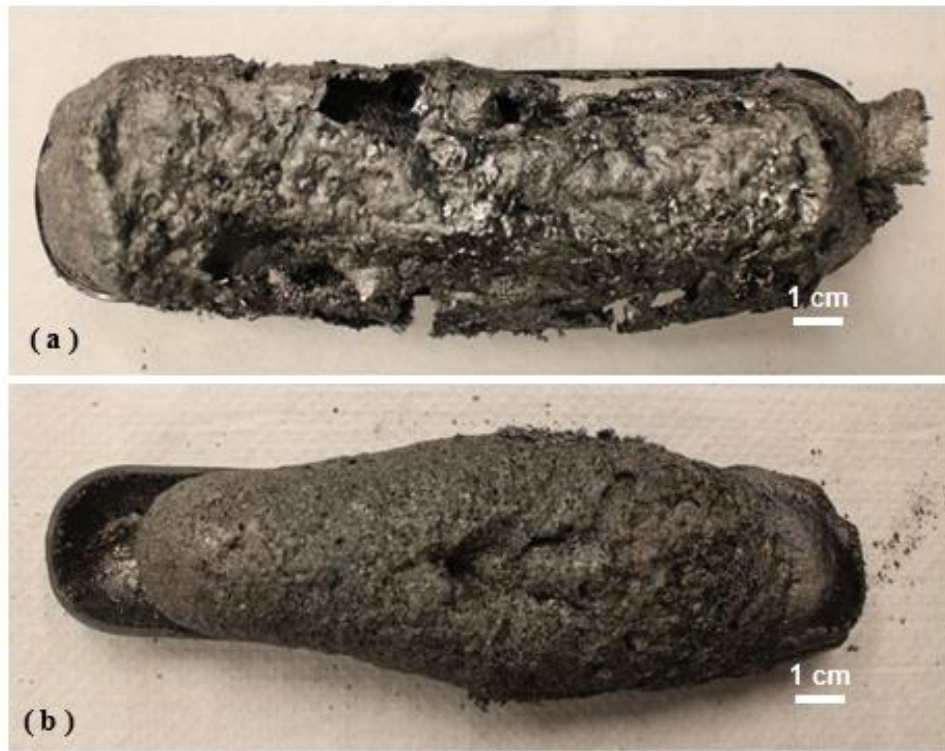

**Supplementary Figure 1. Surface texture of (a) S600-3 and (b) P600-3**

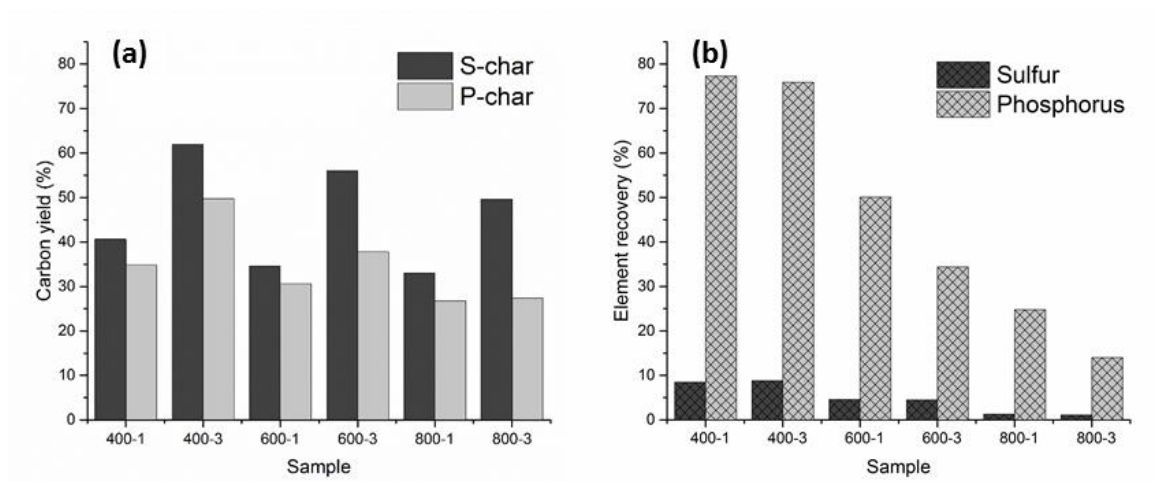

**Supplementary Figure 2. (a) Carbon and (b) sulfur/phosphorus yields for S- and P-chars**

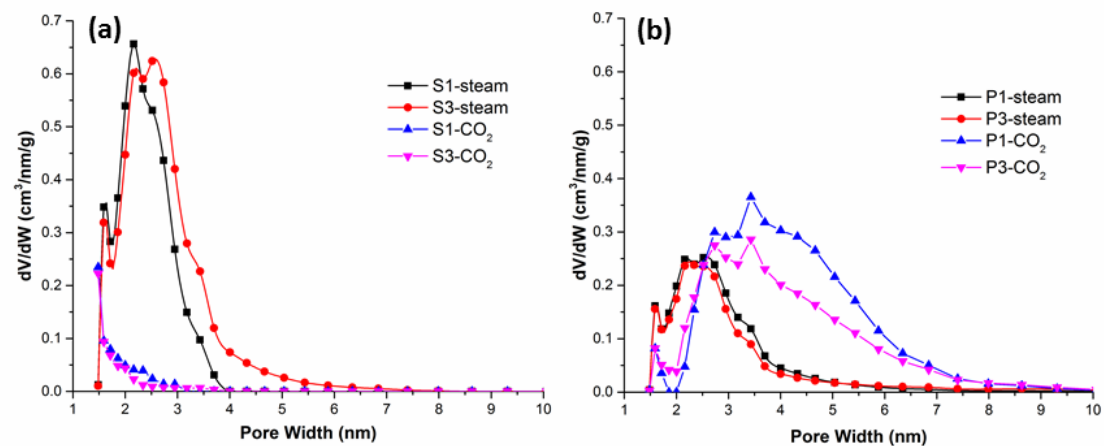

**Supplementary Figure 3. Pore size distribution of (a) S-ACs, and (b) P-ACs**

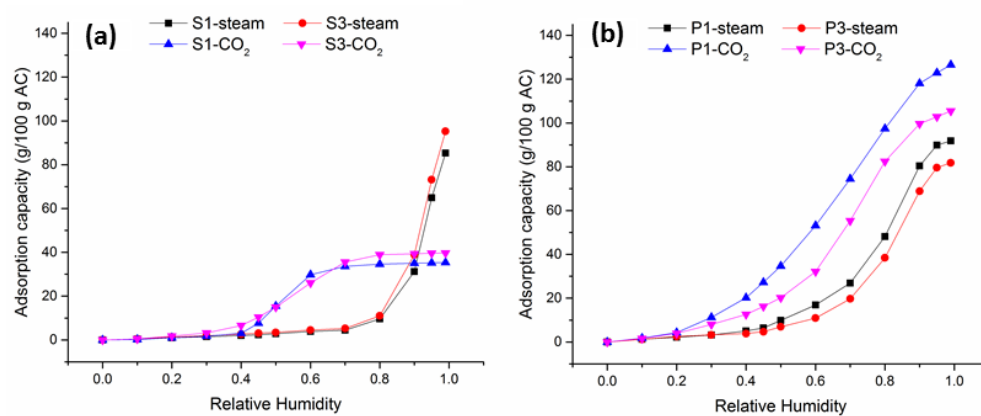

**Supplementary Figure 4. Water vapor adsorption isotherms at 25 °C for ACs prepared from glycerol-based (a) S- and (b) P-chars**

**Supplementary Table 1. Pseudo-second-order rate constants and Cr (VI) removal for glycerol-based ACs**

| Sample             | Second-pseudo-order model |                         |                | Removal (%) |         |         |         |         |          |
|--------------------|---------------------------|-------------------------|----------------|-------------|---------|---------|---------|---------|----------|
|                    | q <sub>e</sub> (mg/g)     | K <sub>2</sub> (g/mg-h) | R <sup>2</sup> | 10 mg/L     | 20 mg/L | 30 mg/L | 50 mg/L | 80 mg/L | 100 mg/L |
| S3-steam           | 30.40                     | 0.003612                | 0.9996         | 98.4        | 98.1    | 79.4    | 56.2    | 40.5    | 33.6     |
| S3-CO <sub>2</sub> | 18.98                     | 0.006926                | 0.9998         | 88.0        | 62.8    | 47.6    | 34.4    | 22.4    | 17.7     |
| P1-steam           | 32.05                     | 0.002653                | 0.9998         | 85.6        | 83.9    | 71.4    | 60.2    | 47.4    | 40.0     |
| P1-CO <sub>2</sub> | 40.65                     | 0.001412                | 0.9993         | 95.8        | 85.4    | 82.3    | 78.6    | 66.0    | 57.6     |
